# Supplementary material for: The Spatial and Cell-Type Distribution of SARS-CoV-2 Receptor ACE2 in the Human and Mouse Brains
Source: Front Neurol. 2021 Jan 20;11:573095. doi: 10.3389/fneur.2020.573095 (PMC7855591; doi:10.3389/fneur.2020.573095)
Supplement: Supplementary file 1 [file Table_1.XLSX]

## Sheet: Figure 1
Figure 1A (Right barplot)
Brain area	Positive sample%
amygdala	0.657895
anterior cingulate cortex	1.13636
caudate	1.21951
cortex	0.392157
frontal cortex	0.956938
hippocampus	2.03046
hypothalamusn	1.48515
nucleus accumbens	0.406504
putamen	0.487805
spinal cord	2.51572
substantia nigra	3.59712
cerebellum	0
cerebellar hemisphere	0
Lung	6.57439

## Sheet: Figure 2C
Brain area	probe 1: A_23_P252981	probe 2: CUST_16267_PI416261804				Total expresion dataset	locus ceruleus	2.0084	8.1341
Central glial substance	5.0298	6.573					central glial substance	5.4676	6.573
Choroid plexus of the lateral ventricle	4.7615	6.1802					central glial substance	5.0298	6.4679
Paraventricular nuclei of thalamus	3.5459	4.6711					central glial substance	3.844	6.3189
Body of the caudate nucleus	3.3514	3.661					choroid plexus of the lateral ventricle	4.0282	6.1802
Posterior group of nuclei	3.1353	4.1554					choroid plexus of the lateral ventricle	4.4973	6.1477
Midbrain raphe nuclei	2.6906	3.7419					choroid plexus of the lateral ventricle	4.7615	6.1348
Raphe nuclei of medulla	4.0967	2.8815					paraventricular nuclei of thalamus	3.5459	5.2031
Planum polare	5.0293	2.8241					amygdalohippocampal transition zone	1.8477	4.9661
Anterior hypothalamic area	3.1342	3.0783					paraventricular nuclei of thalamus	2.7397	4.6711
Dorsomedial hypothalamic nucleus	3.6305	2.8895					CA4 field	1.872	4.5416
Vestibular nuclei	3.392	2.9059					habenular nuclei	1.5318	4.3306
Oculomotor nuclear complex	2.8164	3.4776					pontine nuclei	1.9968	4.289
Hypoglossal nucleus	3.385	3.4879					posterior group of nuclei	1.1013	4.1554
Midbrain reticular formation	3.1171	3.3191					subcallosal cingulate gyrus	1.5104	4.134
Piriform cortex	3.2609	3.2407					substantia innominata	1.9731	4.1339
Posterior hypothalamic area	2.6499	3.5564					lateral hypothalamic area, anterior region	2.0211	4.0048
Parolfactory gyri	2.6393	3.4045					claustrum	1.9436	3.9907
Nucleus accumbens	2.8044	3.684					posterior group of nuclei	1.715	3.9546
Ventromedial hypothalamic nucleus	2.5909	3.3909					CA1 field	1.9665	3.9155
X	2.5027	2.3895					fusiform gyrus	2.0153	3.8954
Tuberomammillary nucleus	2.6781	3.7966					lateral hypothalamic area, mammillary region	1.0585	3.8641
Rostral group of intralaminar nuclei	2.4156	3.6587					CA3 field	0.9958	3.8333
Locus ceruleus	2.5866	8.1341					central nucleus	1.937	3.8111
Paraventricular nucleus of the hypothalamus	2.3442	3.7932					tuberomammillary nucleus	2.4192	3.7966
Amygdalohippocampal transition zone	2.216	4.9661					paraventricular nucleus of the hypothalamus	1.661	3.7932
Ca4 field	2.1892	4.5416					paraventricular nucleus of the hypothalamus	2.4584	3.7711
Habenular nuclei	2.2647	4.3306					paraventricular nucleus of the hypothalamus	2.3442	3.771
Pontine nuclei	2.0549	4.289					preoptic region	1.0798	3.763
Ca1 field	1.7374	3.9155					fastigial nucleus	2.2117	3.7586
Subcallosal cingulate gyrus	1.8215	4.134					midbrain raphe nuclei	1.6081	3.7419
							tail of the caudate nucleus	1.6077	3.7335
							ventral thalamus	1.6985	3.7209
							lateral nucleus	1.6386	3.7174
							red nucleus	1.8318	3.6911
							mammillary body	1.3924	3.6885
							nucleus accumbens	1.8708	3.684
							dorsal lateral geneiculate nucleus	1.7883	3.6759
							body of the caudate nucleus	3.3514	3.661
							preoptic region	1.8168	3.6588
							rostral group of intralaminar nuclei	1.8479	3.6587
							ventral thalamus	1.7218	3.6288
							nucleus accumbens	2.1035	3.6277
							ventral thalamus	2.1694	3.6161
							dorsal motor nucleus of the vagus	1.4345	3.6144
							trigeminal nuclei	2.0586	3.6067
							central nucleus	1.9975	3.5801
							cingulum bundle	2.1441	3.5794
							subthalamus	1.7925	3.5738
							lateral hypothalamic area, tuberal region	2.2508	3.5639
							posterior hypothalamic area	2.6499	3.5564
							CA2 field	2.2651	3.5487
							dentate gyrus	1.4739	3.5396
							CA4 field	1.1011	3.5016
							CA4 field	2.1892	3.4976
							hypoglossal nucleus	2.0434	3.4879
							oculomotor nuclear complex	1.8177	3.4776
							amygdalohippocampal transition zone	2.2997	3.4746
							septal nuclei	1.8786	3.4572
							lateral hypothalamic area, mammillary region	2.0532	3.4521
							medial parabrachial nucleus	2.1841	3.4499
							CA3 field	2.0106	3.4433
							facial motor nucleus	2.1493	3.4273
							subiculum	1.7004	3.4216
							parolfactory gyri	1.3541	3.4045
							substantia nigra	2.2531	3.3933
							substantia innominata	2.1994	3.3922
							ventromedial hypothalamic nucleus	0.9128	3.3909
							lateral nucleus	1.9373	3.3599
							amygdalohippocampal transition zone	2.216	3.3472
							III	2.3517	3.3423
							vestibular nuclei	3.392	3.3413
							central glial substance	1.7613	3.3289
							globus pallidus, internal segment	1.3814	3.3216
							midbrain reticular formation	2.2453	3.3191
							facial motor nucleus	1.7867	3.3162
							supraoptic nucleus	1.6172	3.3125
							septal nuclei	1.8404	3.3121
							medial group of nuclei	1.6199	3.2987
							substantia innominata	2.0911	3.2869
							tail of the caudate nucleus	2.0302	3.284
							basomedial nucleus	2.0597	3.2771
							trigeminal nuclei	2.3027	3.2769
							substantia innominata	1.7279	3.2749
							medial group of nuclei	2.0672	3.2744
							lateral parabrachial nucleus	0.883	3.273
							medial parabrachial nucleus	2.4121	3.2706
							basomedial nucleus	1.012	3.2666
							cortico-medial group	1.7096	3.2646
							CA3 field	1.1339	3.2608
							ventral tegmental area	2.6675	3.2581
							caudal group of intralaminar nuclei	1.6712	3.2573
							tail of the caudate nucleus	2.1872	3.2553
							amygdalohippocampal transition zone	1.3009	3.2507
							body of the caudate nucleus	2.2049	3.244
							nucleus accumbens	2.2324	3.2439
							central nucleus	2.6151	3.2422
							substantia innominata	2.0969	3.2408
							piriform cortex	3.2609	3.2407
							VIIB	1.8764	3.2357
							head of the caudate nucleus	2.0155	3.235
							VIIIA	2.0137	3.2288
							pontine raphe nucleus	1.9601	3.2256
							nucleus accumbens	2.095	3.2154
							I-II	1.8137	3.215
							subthalamus	1.5407	3.2123
							III	2.0035	3.211
							ventral tegmental area	2.2526	3.2088
							paraventricular nuclei of thalamus	2.0315	3.2071
							trochlear nucleus	2.2405	3.2066
							lateral group of nuclei, dorsal division	1.3822	3.2061
							locus ceruleus	2.1433	3.206
							VIIIB	2.0726	3.1974
							lateral group of nuclei, dorsal division	2.1826	3.1971
							globose nucleus	2.1128	3.1851
							habenular nuclei	0.716	3.1841
							lateral nucleus	2.0569	3.1785
							inferior colliculus	2.1049	3.1782
							dorsal motor nucleus of the vagus	1.7416	3.174
							cortico-medial group	1.3173	3.1735
							cortico-medial group	0.8839	3.1707
							midbrain raphe nuclei	2.6906	3.1649
							VIIB	1.8226	3.1596
							rostral group of intralaminar nuclei	1.6572	3.159
							cingulate gyrus, parietal part	1.9814	3.1583
							subiculum	1.483	3.1581
							red nucleus	2.2628	3.1528
							medial parabrachial nucleus	1.7546	3.1478
							subthalamus	2.1473	3.145
							posterior orbital gyrus	2.1037	3.1389
							substantia nigra	2.1403	3.1347
							V	2.0633	3.1316
							red nucleus	2.1745	3.1279
							lateral hypothalamic area, anterior region	1.8555	3.1256
							supraoptic nucleus	1.453	3.1205
							body of the caudate nucleus	1.8533	3.1154
							cuneate nucleus	2.0961	3.1146
							body of the caudate nucleus	1.4916	3.114
							central gray of the pons	1.8152	3.0946
							postcentral gyrus	1.3352	3.0886
							superior olivary complex	1.9483	3.0873
							superior colliculus	1.9301	3.0871
							oculomotor nuclear complex	2.8164	3.0865
							VI	1.8505	3.0834
							anterior orbital gyrus	2.3884	3.0804
							anterior hypothalamic area	3.1342	3.0783
							central gray substance of midbrain	1.9128	3.0709
							posterior orbital gyrus	2.0228	3.0628
							CA2 field	1.74	3.0621
							hypoglossal nucleus	3.385	3.0536
							IX	1.724	3.0507
							Edinger-Westphal nucleus	1.5018	3.035
							dentate nucleus	1.4432	3.0314
							V	1.7854	3.0305
							IV	1.9471	3.028
							posterior hypothalamic area	1.9428	3.0271
							head of the caudate nucleus	1.8116	3.0249
							dentate gyrus	1.8334	3.0192
							lateral hypothalamic area, anterior region	1.6857	3.0183
							dentate gyrus	1.571	3.015
							central gray substance of midbrain	2.1455	3.0142
							basomedial nucleus	1.8781	3.0081
							pontine raphe nucleus	1.9034	3.0074
							perifornical nucleus	2.146	3.0029
							basolateral nucleus	1.9252	3.0024
							IX	1.9356	2.9998
							dorsal lateral geneiculate nucleus	1.3567	2.9995
							oculomotor nuclear complex	2.6834	2.9951
							raphe nuclei of medulla	2.0737	2.9922
							ventromedial hypothalamic nucleus	2.5909	2.9906
							subiculum	1.9575	2.9833
							cingulate gyrus, parietal part	1.8526	2.9776
							putamen	2.2767	2.9694
							medial orbital gyrus	2.0381	2.9651
							raphe nuclei of medulla	1.6983	2.9616
							cingulate gyrus, frontal part	1.8037	2.9601
							lateral hypothalamic area, tuberal region	1.9113	2.9564
							vestibular nuclei	2.1712	2.9561
							supramammillary nucleus	2.1279	2.9559
							nucleus of Darkschewitsch	1.5395	2.951
							long insular gyri	2.0475	2.9472
							claustrum	2.2648	2.9464
							lateral parabrachial nucleus	2.4117	2.9397
							central gray substance of midbrain	2.1811	2.9388
							central gray substance of midbrain	1.3376	2.9387
							trochlear nucleus	2.2903	2.935
							septal nuclei	1.9406	2.9323
							anterior group of nuclei	1.4538	2.9304
							corpus callosum	1.3951	2.9278
							medial geniculate complex	1.772	2.9254
							globus pallidus, external segment	1.722	2.9234
							facial motor nucleus	1.8997	2.9199
							VIIB	1.7116	2.9198
							tuberomammillary nucleus	2.6781	2.9114
							vestibular nuclei	1.5221	2.9059
							amygdalohippocampal transition zone	0.6808	2.9054
							medial group of nuclei	2.3526	2.9029
							basolateral nucleus	1.962	2.8964
							lateral group of nuclei, ventral division	1.8232	2.894
							dorsomedial hypothalamic nucleus	1.2298	2.8895
							superior colliculus	1.0828	2.8887
							body of the caudate nucleus	1.8704	2.8879
							dentate nucleus	2.1487	2.8864
							III	1.8937	2.8862
							gigantocellular group	1.7779	2.8857
							cuneate nucleus	1.9759	2.8854
							raphe nuclei of medulla	1.5199	2.8815
							tail of the caudate nucleus	2.5453	2.881
							gracile nucleus	2.3109	2.876
							spinal trigeminal nucleus	2.1038	2.8743
							locus ceruleus	1.7542	2.8735
							globus pallidus, internal segment	2.2369	2.8713
							gigantocellular group	1.5687	2.8711
							medial geniculate complex	1.533	2.8697
							ventral tegmental area	2.119	2.8616
							parahippocampal gyrus	1.4781	2.8613
							lateral orbital gyrus	1.6162	2.8609
							dentate gyrus	1.4755	2.8564
							medial orbital gyrus	1.6774	2.8555
							short insular gyri	1.4414	2.8537
							trigeminal nuclei	1.3375	2.8532
							facial motor nucleus	2.159	2.8524
							arcuate nucleus of medulla	2.2461	2.8518
							subiculum	2.2662	2.8509
							precentral gyrus	1.9275	2.8466
							claustrum	1.9572	2.8414
							rostral group of intralaminar nuclei	2.4156	2.8348
							paracentral lobule, posterior part	2.0528	2.8322
							short insular gyri	1.2898	2.8315
							anterior group of nuclei	1.674	2.8313
							III	1.1963	2.8275
							medial geniculate complex	1.0497	2.8269
							planum polare	1.9066	2.8241
							cochlear nuclei	2.0738	2.8239
							red nucleus	1.5547	2.8232
							medial geniculate complex	1.5877	2.8221
							superior rostral gyrus	1.1718	2.8165
							vestibular nuclei	1.8703	2.8115
							superior olivary complex	1.3482	2.8097
							supraoptic nucleus	1.93	2.8077
							globus pallidus, external segment	2.1056	2.8024
							inferior olivary complex	2.0768	2.8004
							central gray substance of midbrain	1.3077	2.7971
							globus pallidus, internal segment	1.8699	2.7956
							supramammillary nucleus	1.6596	2.7926
							lateral orbital gyrus	1.7293	2.7886
							midbrain reticular formation	2.7924	2.7873
							paramedian pontine reticular formation	2.7357	2.7843
							CA4 field	1.7169	2.7787
							ventral thalamus	1.8587	2.7786
							claustrum	1.987	2.7785
							dorsal lateral geneiculate nucleus	1.8363	2.7773
							paracentral lobule, anterior part	2.115	2.7699
							lateral group of nuclei, dorsal division	1.5735	2.7693
							fastigial nucleus	2.3028	2.7583
							inferior frontal gyrus, triangular part	1.5796	2.7569
							inferior frontal gyrus, orbital part	1.673	2.7558
							anterior group of nuclei	2.1559	2.7543
							midbrain reticular formation	3.1171	2.7538
							inferior colliculus	1.1124	2.7537
							occipito-temporal gyrus	1.7149	2.7501
							X	2.5027	2.7497
							hypoglossal nucleus	1.5569	2.7446
							locus ceruleus	2.5866	2.7418
							lateral medullary reticular group	1.9561	2.7417
							preoptic region	2.0478	2.7314
							pretectal region	1.707	2.729
							temporal pole	1.9189	2.7253
							dorsomedial hypothalamic nucleus	3.6305	2.7205
							central medullary reticular group	2.4271	2.719
							CA4 field	1.2081	2.7175
							short insular gyri	1.0468	2.7155
							VIIB	2.094	2.7132
							superior temporal gyrus	1.9666	2.7117
							crus I	1.8599	2.7078
							arcuate nucleus of the hypothalamus	1.1627	2.7061
							inferior olivary complex	1.9587	2.7053
							dentate nucleus	1.9065	2.7014
							arcuate nucleus of medulla	2.4204	2.6957
							hypoglossal nucleus	2.4135	2.6898
							dorsal motor nucleus of the vagus	1.7874	2.6866
							frontal pole	1.6687	2.6862
							CA1 field	2.1988	2.6861
							globus pallidus, external segment	0.9782	2.686
							VIIAt	2.4437	2.6854
							supramarginal gyrus	1.9753	2.6785
							spinal trigeminal nucleus	1.8538	2.6784
							VI	1.8096	2.6739
							caudal group of intralaminar nuclei	2.2283	2.672
							lateral group of nuclei, dorsal division	1.0042	2.6707
							occipito-temporal gyrus	1.8402	2.6695
							emboliform nucleus	1.8483	2.6639
							trigeminal nuclei	1.5562	2.6601
							rostral group of intralaminar nuclei	2.106	2.654
							gyrus rectus	1.9106	2.6537
							preoptic region	1.9371	2.6484
							central nucleus	1.7894	2.648
							fusiform gyrus	1.3916	2.6467
							parahippocampal gyrus	2.3656	2.6461
							ventromedial hypothalamic nucleus	2.1628	2.6458
							superior olivary complex	1.6701	2.6421
							spinal trigeminal nucleus	1.6165	2.641
							angular gyrus	2.0212	2.6387
							cingulate gyrus, parietal part	2.0897	2.6335
							lateral medullary reticular group	2.4628	2.6329
							globose nucleus	1.9864	2.6313
							globus pallidus, internal segment	1.6503	2.6231
							dorsal motor nucleus of the vagus	2.0995	2.619
							pontine nuclei	2.0549	2.618
							postcentral gyrus	1.9452	2.6177
							nucleus subceruleus	2.3286	2.6073
							midbrain raphe nuclei	1.4254	2.6063
							cuneate nucleus	2.3385	2.6047
							globus pallidus, external segment	1.8451	2.6044
							midbrain reticular formation	2.1711	2.6024
							corpus callosum	2.0175	2.6021
							spinal trigeminal nucleus	2.39	2.5993
							cingulate gyrus, frontal part	1.5771	2.5979
							basolateral nucleus	2.1913	2.5971
							ventral thalamus	1	2.5935
							inferior temporal gyrus	1.9631	2.5933
							cingulate gyrus, retrosplenial part	1.8251	2.592
							lateral medullary reticular group	2.3562	2.5913
							pontine nuclei	1.674	2.5894
							gyrus rectus	2.0062	2.5874
							anterior group of nuclei	1.5649	2.5871
							paramedian pontine reticular formation	2.2232	2.5854
							superior frontal gyrus	1.954	2.5844
							superior parietal lobule	2.3423	2.5843
							abducens nucleus	1.8305	2.5839
							arcuate nucleus of medulla	1.66	2.5755
							inferior rostral gyrus	1.547	2.5735
							CA4 field	2.0134	2.5701
							middle temporal gyrus	2.0038	2.5688
							medial orbital gyrus	2.0653	2.5682
							superior temporal gyrus	2.02	2.5677
							crus II	1.7502	2.5665
							lateral group of nuclei, ventral division	2.0321	2.5652
							trigeminal nuclei	1.6438	2.565
							putamen	1.2821	2.5637
							lateral group of nuclei, ventral division	2.1371	2.5631
							parolfactory gyri	1.6494	2.5613
							globose nucleus	2.2466	2.5596
							crus I	1.8215	2.5571
							lateral group of nuclei, ventral division	2.3465	2.5554
							V	2.2351	2.5528
							emboliform nucleus	2.1013	2.5411
							cortico-medial group	2.1851	2.5385
							arcuate nucleus of medulla	1.7117	2.5375
							superior occipital gyrus	1.7622	2.5351
							ventral thalamus	1.6591	2.5351
							angular gyrus	1.8207	2.5342
							paraventricular nucleus of the hypothalamus	1.6564	2.5309
							vestibular nuclei	1.7088	2.5269
							parahippocampal gyrus	1.6804	2.5204
							dentate gyrus	0.9114	2.5184
							frontal pole	1.6132	2.5172
							CA2 field	1.5668	2.5155
							CA3 field	1.891	2.5081
							crus II	1.8227	2.5065
							lateral orbital gyrus	1.0402	2.5052
							paracentral lobule, anterior part	1.7146	2.5021
							precentral gyrus	1.6611	2.4981
							putamen	1.9682	2.4928
							gigantocellular group	2.3239	2.4902
							inferior occipital gyrus	1.3426	2.4889
							lateral tuberal nucleus	1.6612	2.4882
							parahippocampal gyrus	1.2542	2.4857
							abducens nucleus	1.6676	2.4836
							fusiform gyrus	1.8478	2.4811
							VIIIB	2.0401	2.4761
							nucleus subceruleus	1.6018	2.4745
							central nucleus	2.1273	2.4697
							dorsal lateral geneiculate nucleus	1.9508	2.4595
							dorsal lateral geneiculate nucleus	1.2882	2.4535
							long insular gyri	1.728	2.4485
							short insular gyri	1.858	2.4463
							substantia nigra	1.6671	2.4447
							raphe nuclei of medulla	1.9824	2.4406
							postcentral gyrus	1.7965	2.4393
							central medullary reticular group	1.8085	2.4388
							temporal pole	2.0645	2.4383
							midbrain raphe nuclei	1.9684	2.4334
							fusiform gyrus	1.8599	2.4333
							superior rostral gyrus	1.9991	2.4328
							putamen	1.7131	2.4287
							cingulate gyrus, frontal part	1.8664	2.4182
							substantia nigra	1.7648	2.4176
							VI	2.1198	2.4174
							lateral parabrachial nucleus	1.8865	2.4165
							substantia nigra	2.1289	2.4158
							lateral medullary reticular group	2.266	2.4121
							frontal operculum	2.0071	2.4105
							inferior temporal gyrus	1.5797	2.4104
							supramammillary nucleus	2.007	2.4023
							nucleus subceruleus	1.5317	2.3961
							spinal trigeminal nucleus	1.8606	2.3959
							central medullary reticular group	1.9563	2.3933
							superior rostral gyrus	1.8432	2.3929
							abducens nucleus	2.3491	2.3919
							superior frontal gyrus	1.7817	2.3895
							X	1.422	2.3895
							ventral tegmental area	1.6349	2.3843
							pineal gland	1.3803	2.3838
							paracentral lobule, anterior part	1.6694	2.3835
							superior parietal lobule	1.8486	2.3831
							precuneus	1.6776	2.3789
							VIIIA	2.076	2.3781
							subthalamus	1.9338	2.378
							superior occipital gyrus	1.1915	2.3754
							substantia nigra	1.7037	2.3715
							middle frontal gyrus	1.9252	2.3702
							parolfactory gyri	2.6393	2.3668
							lateral hypothalamic area, mammillary region	2.8242	2.3611
							globose nucleus	2.2915	2.3585
							supraoptic nucleus	1.492	2.358
							middle frontal gyrus	1.6526	2.3547
							medial geniculate complex	2.4094	2.3528
							planum polare	2.1292	2.3489
							paramedian pontine reticular formation	2.2308	2.3479
							caudal group of intralaminar nuclei	1.4306	2.3479
							paramedian pontine reticular formation	1.4885	2.346
							VIIAt	1.3326	2.3393
							middle temporal gyrus	1.3889	2.3367
							nucleus subceruleus	1.9586	2.335
							habenular nuclei	2.2647	2.3349
							transverse gyri	2.1069	2.3308
							midbrain raphe nuclei	2.4734	2.3302
							paramedian pontine reticular formation	1.8017	2.3294
							globus pallidus, external segment	1.5116	2.3288
							cuneus	1.5024	2.3283
							precuneus	1.4301	2.3274
							inferior frontal gyrus, orbital part	1.7848	2.3251
							VIIAf	2.0362	2.3249
							middle temporal gyrus	1.7091	2.3198
							inferior frontal gyrus, opercular part	2.1724	2.3192
							inferior temporal gyrus	1.9197	2.3189
							VIIIB	1.1073	2.3168
							medial group of nuclei	1.5419	2.3161
							cingulate gyrus, retrosplenial part	1.1485	2.3139
							corpus callosum	1.7951	2.3098
							superior temporal gyrus	1.1727	2.3098
							pontine nuclei	2.1155	2.3081
							Heschl's gyrus	1.8827	2.3074
							emboliform nucleus	1.6542	2.3032
							superior frontal gyrus	1.561	2.3021
							nucleus accumbens	2.8044	2.3016
							supramammillary nucleus	1.2659	2.2991
							inferior rostral gyrus	0.9156	2.2958
							VIIAf	1.3108	2.2941
							abducens nucleus	1.5584	2.293
							inferior frontal gyrus, opercular part	1.5934	2.2885
							precuneus	1.7905	2.2871
							middle frontal gyrus	1.6697	2.282
							frontal operculum	1.7761	2.2816
							superior frontal gyrus	1.5877	2.281
							inferior frontal gyrus, opercular part	1.7013	2.2764
							VIIB	1.0591	2.2763
							superior occipital gyrus	1.6589	2.2756
							short insular gyri	1.6341	2.2756
							lingual gyrus	1.8222	2.2744
							planum temporale	1.9564	2.2733
							inferior temporal gyrus	1.4246	2.272
							precentral gyrus	1.8758	2.2712
							lateral tuberal nucleus	2.2332	2.2696
							CA1 field	1.7374	2.2695
							head of the caudate nucleus	1.3482	2.2671
							perifornical nucleus	2.3301	2.2651
							CA2 field	1.3842	2.2644
							inferior frontal gyrus, triangular part	2.1246	2.2598
							raphe nuclei of medulla	4.0967	2.2583
							VIIIB	1.7371	2.2531
							lingual gyrus	1.2249	2.2513
							VIIIA	1.9888	2.2508
							gigantocellular group	2.0542	2.2452
							inferior occipital gyrus	0.9702	2.243
							angular gyrus	1.2654	2.2429
							mammillary body	1.6017	2.2422
							arcuate nucleus of the hypothalamus	1.7867	2.2408
							mammillary body	1.881	2.2394
							long insular gyri	1.3591	2.239
							posterior orbital gyrus	1.1038	2.2344
							subthalamus	1.6382	2.2299
							caudal group of intralaminar nuclei	1.4596	2.2255
							VIIAt	1.7248	2.2241
							supramarginal gyrus	1.7218	2.2205
							oculomotor nuclear complex	1.2518	2.2079
							gracile nucleus	1.451	2.2078
							VIIIA	1.6993	2.2064
							cuneate nucleus	1.5245	2.2062
							precentral gyrus	1.7217	2.2049
							inferior rostral gyrus	1.5872	2.203
							dentate nucleus	1.3695	2.202
							superior parietal lobule	1.3687	2.2003
							long insular gyri	1.855	2.1992
							paracentral lobule, posterior part	1.5119	2.1963
							cuneus	1.8512	2.1952
							IV	2.0468	2.1931
							superior olivary complex	1.489	2.1913
							angular gyrus	1.4151	2.1898
							lingual gyrus	1.3703	2.1892
							cingulate gyrus, frontal part	1.9675	2.188
							central medullary reticular group	1.172	2.1868
							gyrus rectus	1.7754	2.1851
							IX	1.6046	2.1802
							pontine raphe nucleus	1.8859	2.1771
							IX	1.9577	2.1737
							CA3 field	1.9276	2.1734
							claustrum	1.94	2.1722
							basolateral nucleus	2.2043	2.1706
							pontine nuclei	2.0956	2.1692
							lateral nucleus	1.66	2.1637
							claustrum	1.9828	2.1604
							posterior group of nuclei	1.8884	2.1542
							VIIIA	1.0652	2.1528
							posterior hypothalamic area	2.2847	2.1526
							substantia innominata	1.8842	2.1519
							inferior frontal gyrus, triangular part	1.5616	2.1498
							VI	1.8607	2.1497
							superior frontal gyrus	1.6885	2.1476
							subcallosal cingulate gyrus	1.297	2.1469
							cuneus	1.802	2.1462
							inferior occipital gyrus	1.7011	2.1461
							supramarginal gyrus	1.8848	2.142
							supramarginal gyrus	1.5221	2.1413
							superior temporal gyrus	1.7921	2.141
							gigantocellular group	1.6675	2.14
							V	1.0868	2.1394
							cortico-medial group	2.0822	2.1369
							temporal pole	1.3822	2.1366
							CA1 field	1.3622	2.1364
							lingual gyrus	2.0482	2.1347
							planum polare	2.0834	2.1327
							cingulate gyrus, retrosplenial part	1.52	2.1294
							parahippocampal gyrus	1.64	2.1272
							basolateral nucleus	2.1486	2.1266
							superior colliculus	1.1336	2.1251
							dorsomedial hypothalamic nucleus	1.8401	2.1215
							IV	1.798	2.1211
							planum temporale	2.2182	2.119
							head of the caudate nucleus	2.0214	2.113
							pontine raphe nucleus	1.5527	2.1004
							head of the caudate nucleus	1.4469	2.0995
							ventral tegmental area	2.0183	2.0911
							pontine nuclei	1.4208	2.09
							raphe nuclei of medulla	1.7331	2.089
							pretectal region	2.0282	2.0883
							gracile nucleus	1.9811	2.0856
							Edinger-Westphal nucleus	2.1969	2.0849
							putamen	1.7756	2.0833
							angular gyrus	1.9459	2.082
							cuneate nucleus	1.8844	2.0803
							lateral hypothalamic area, anterior region	1.4484	2.0797
							medial geniculate complex	1.2911	2.0781
							precuneus	1.9765	2.0762
							postcentral gyrus	1.8675	2.068
							septal nuclei	1.6952	2.0618
							medial parabrachial nucleus	1.9161	2.0615
							lateral group of nuclei, ventral division	1.831	2.0557
							lateral hypothalamic area, tuberal region	2.1283	2.0555
							postcentral gyrus	1.5507	2.0529
							inferior frontal gyrus, orbital part	1.8696	2.0527
							IV	1.842	2.0491
							superior occipital gyrus	1.3229	2.0459
							interstitial nucleus of Cajal	2.0796	2.0409
							interstitial nucleus of Cajal	2.1332	2.0405
							lateral group of nuclei, dorsal division	1.7181	2.0392
							CA2 field	1.8459	2.039
							basomedial nucleus	1.7431	2.0371
							fastigial nucleus	2.0602	2.0368
							occipital pole	1.6723	2.0359
							subcallosal cingulate gyrus	1.6693	2.0258
							cuneate nucleus	1.5688	2.0251
							X	1.816	2.0236
							temporal pole	1.9164	2.0233
							cochlear nuclei	1.5761	2.0209
							inferior olivary complex	1.9223	2.0203
							paramedian pontine reticular formation	2.0421	2.0159
							crus II	1.5241	2.0026
							perifornical nucleus	2.1331	2.0025
							cingulate gyrus, frontal part	1.6303	2.0022
							lateral orbital gyrus	1.0321	1.9952
							inferior olivary complex	1.8767	1.9944
							caudal group of intralaminar nuclei	1.3056	1.9935
							posterior hypothalamic area	1.95	1.9908
							posterior hypothalamic area	1.9189	1.9877
							anterior hypothalamic area	1.9694	1.9827
							inferior temporal gyrus	1.2474	1.9818
							abducens nucleus	2.149	1.9804
							cortico-medial group	2.0594	1.9795
							medial parabrachial nucleus	1.5701	1.9778
							middle temporal gyrus	1.9946	1.9726
							inferior occipital gyrus	1.8555	1.9713
							VIIIB	0.9849	1.9713
							spinal trigeminal nucleus	1.6378	1.9683
							inferior frontal gyrus, triangular part	1.6186	1.9669
							globus pallidus, internal segment	1.4927	1.9656
							fusiform gyrus	1.8223	1.965
							CA2 field	1.9804	1.9544
							middle temporal gyrus	1.1256	1.9544
							occipito-temporal gyrus	1.885	1.9542
							preoptic region	1.9663	1.9539
							superior occipital gyrus	1.5779	1.9537
							lateral tuberal nucleus	1.9078	1.9519
							basomedial nucleus	1.9782	1.9499
							body of the caudate nucleus	1.8593	1.9492
							lingual gyrus	1.8228	1.949
							tail of the caudate nucleus	1.9757	1.947
							putamen	1.5295	1.9461
							globus pallidus, internal segment	1.8804	1.9385
							inferior olivary complex	1.4759	1.9362
							long insular gyri	1.1442	1.9328
							gigantocellular group	1.4908	1.9321
							CA3 field	2.2459	1.9276
							VIIIB	2.3932	1.9261
							perifornical nucleus	1.8969	1.9245
							lateral group of nuclei, dorsal division	1.2986	1.9226
							facial motor nucleus	2.2555	1.9213
							inferior frontal gyrus, orbital part	2.3941	1.9158
							VIIB	1.1495	1.9129
							cingulate gyrus, parietal part	1.8415	1.9104
							superior temporal gyrus	1.3694	1.9075
							occipito-temporal gyrus	1.4672	1.9066
							central nucleus	1.8749	1.9058
							middle frontal gyrus	1.332	1.9021
							lateral nucleus	1.9466	1.8978
							anterior group of nuclei	1.7912	1.8958
							inferior colliculus	2.005	1.8948
							cuneus	1.8734	1.8938
							middle frontal gyrus	1.3316	1.8919
							posterior group of nuclei	1.0585	1.8918
							lateral hypothalamic area, mammillary region	1.6906	1.8889
							septal nuclei	1.8939	1.8879
							red nucleus	1.5559	1.887
							medial orbital gyrus	1.3981	1.8868
							superior parietal lobule	1.7344	1.8864
							amygdalohippocampal transition zone	1.8577	1.8852
							frontal operculum	1.8756	1.8809
							piriform cortex	1.8361	1.8805
							crus I	1.6909	1.8765
							I-II	1.1311	1.8727
							dorsomedial hypothalamic nucleus	1.5758	1.8696
							corpus callosum	1.5076	1.8669
							V	1.618	1.8656
							CA1 field	1.9228	1.864
							parolfactory gyri	1.6109	1.8634
							vestibular nuclei	1.4835	1.8622
							paraterminal gyrus	1.446	1.8572
							tail of the caudate nucleus	1.645	1.8553
							lateral hypothalamic area, tuberal region	1.9124	1.8547
							lateral hypothalamic area, mammillary region	1.8396	1.8545
							dentate nucleus	1.9308	1.8541
							lateral hypothalamic area, anterior region	1.9081	1.852
							dorsal lateral geneiculate nucleus	1.3562	1.8463
							cochlear nuclei	1.5206	1.8461
							superior parietal lobule	1.1501	1.8436
							transverse gyri	1.9481	1.8415
							crus II	0.8495	1.831
							subcallosal cingulate gyrus	1.8215	1.8294
							posterior group of nuclei	3.1353	1.823
							dentate gyrus	1.528	1.8228
							Heschl's gyrus	1.3995	1.8172
							VI	1.5583	1.8165
							nucleus accumbens	2.3814	1.8115
							medial orbital gyrus	1.051	1.8075
							lateral orbital gyrus	1.6907	1.8034
							III	1.6746	1.8029
							posterior hypothalamic area	3.0327	1.8002
							red nucleus	1.7373	1.7986
							rostral group of intralaminar nuclei	1.2783	1.7875
							cuneus	1.3899	1.7864
							corpus callosum	2.1652	1.7833
							VIIB	1.5602	1.7827
							IX	1.7395	1.7739
							subiculum	2.1877	1.7727
							IV	1.712	1.7678
							medial group of nuclei	1.8022	1.7672
							anterior orbital gyrus	1.6802	1.7613
							crus I	0.7269	1.7558
							cingulate gyrus, parietal part	1.1145	1.7536
							VIIIB	1.6559	1.7534
							Heschl's gyrus	1.5427	1.7516
							subiculum	1.2844	1.7516
							crus I	1.1475	1.749
							VIIB	0.6761	1.7453
							paracentral lobule, anterior part	1.6286	1.7356
							paracentral lobule, anterior part	1.6944	1.7355
							Heschl's gyrus	1.6781	1.732
							ventromedial hypothalamic nucleus	1.8074	1.7315
							gyrus rectus	1.8175	1.7311
							transverse gyri	1.6917	1.7296
							VIIIA	2.4685	1.7262
							VIIIA	1.1186	1.7257
							transverse gyri	1.5681	1.7204
							VI	1.2145	1.7178
							mammillary body	1.5782	1.7068
							basomedial nucleus	1.7075	1.7066
							lateral medullary reticular group	1.5588	1.7026
							IV	0.9519	1.6987
							V	1.615	1.6876
							VI	1.1439	1.6755
							precentral gyrus	1.1691	1.6741
							ventromedial hypothalamic nucleus	1.7222	1.6721
							VI	1.4122	1.668
							superior olivary complex	1.5763	1.6676
							Heschl's gyrus	0.8293	1.6627
							anterior group of nuclei	1.4054	1.6584
							inferior frontal gyrus, orbital part	1.4281	1.6574
							dentate nucleus	1.6928	1.6547
							tuberomammillary nucleus	1.6218	1.6504
							lateral group of nuclei, ventral division	1.4641	1.6452
							tuberomammillary nucleus	1.5541	1.6448
							lateral nucleus	1.6731	1.6427
							X	0.7828	1.6411
							inferior rostral gyrus	2.0192	1.634
							occipito-temporal gyrus	1.3463	1.6332
							nucleus subceruleus	1.4429	1.6326
							VIIB	1.3896	1.6088
							planum polare	1.6468	1.608
							lateral medullary reticular group	1.4906	1.6037
							nucleus of Darkschewitsch	1.787	1.6001
							VI	1.0535	1.5954
							posterior orbital gyrus	1.6141	1.5863
							mammillary body	1.5521	1.5771
							head of the caudate nucleus	1.5519	1.576
							V	1.4892	1.5642
							cochlear nuclei	1.7262	1.5623
							CA1 field	1.5904	1.562
							IV	1.3888	1.557
							planum polare	5.0293	1.553
							superior rostral gyrus	1.5929	1.5497
							crus II	1.261	1.5423
							paraventricular nucleus of the hypothalamus	1.6372	1.5368
							cochlear nuclei	1.3497	1.5345
							transverse gyri	1.3756	1.5294
							inferior occipital gyrus	1.4108	1.5285
							temporal pole	1.358	1.5283
							superior rostral gyrus	1.1547	1.5282
							precuneus	1.3362	1.522
							VIIIA	1.1134	1.5179
							inferior frontal gyrus, triangular part	1.1515	1.516
							VIIIB	1.5389	1.5152
							supraoptic nucleus	1.6277	1.5146
							cingulate gyrus, parietal part	1.4299	1.5076
							IX	1.3535	1.507
							crus I	1.3103	1.5017
							VIIB	0.8391	1.4983
							IX	1.3763	1.4872
							IX	0.6745	1.4866
							midbrain reticular formation	1.6282	1.4799
							superior colliculus	2.3362	1.4731
							III	1.3326	1.4717
							precuneus	1.4725	1.4663
							crus II	1.3443	1.4606
							pontine raphe nucleus	1.6269	1.456
							VIIIA	1.3789	1.4476
							V	1.4313	1.4449
							precentral gyrus	1.317	1.4448
							angular gyrus	1.4239	1.443
							VIIIB	0.7838	1.4388
							parahippocampal gyrus	1.5685	1.4346
							frontal operculum	0.9983	1.4296
							IV	1.0837	1.4285
							lateral parabrachial nucleus	1.9481	1.428
							inferior temporal gyrus	1.7557	1.428
							paracentral lobule, anterior part	1.3521	1.4247
							parolfactory gyri	1.3056	1.4166
							lateral orbital gyrus	1.3532	1.4142
							middle temporal gyrus	1.3413	1.4113
							short insular gyri	1.2962	1.4113
							inferior rostral gyrus	1.3687	1.4068
							superior frontal gyrus	1.3461	1.406
							occipito-temporal gyrus	1.4021	1.4054
							fusiform gyrus	1.2938	1.4008
							piriform cortex	1.4059	1.3993
							cingulate gyrus, retrosplenial part	1.4582	1.3983
							supramarginal gyrus	1.3205	1.3965
							postcentral gyrus	1.3873	1.3945
							preoptic region	1.3399	1.3928
							planum temporale	1.2672	1.3893
							lingual gyrus	1.4005	1.3881
							rostral group of intralaminar nuclei	1.447	1.3859
							X	1.3443	1.381
							posterior group of nuclei	1.4597	1.3787
							superior parietal lobule	1.4044	1.3784
							inferior frontal gyrus, opercular part	1.2739	1.376
							superior occipital gyrus	1.3805	1.3713
							Heschl's gyrus	1.2722	1.37
							lateral parabrachial nucleus	1.3135	1.3548
							planum polare	1.2298	1.3534
							medial group of nuclei	1.2823	1.353
							basolateral nucleus	2.6062	1.3519
							cingulate gyrus, frontal part	1.583	1.3512
							anterior orbital gyrus	1.2531	1.3512
							cuneus	1.3848	1.3498
							VIIIB	0.8719	1.3424
							frontal operculum	1.1513	1.342
							subthalamus	2.4315	1.3408
							long insular gyri	1.3761	1.3397
							subcallosal cingulate gyrus	1.1013	1.3395
							middle frontal gyrus	1.2123	1.3385
							inferior frontal gyrus, orbital part	1.2515	1.3353
							inferior frontal gyrus, triangular part	1.2813	1.3284
							gyrus rectus	1.295	1.3271
							superior temporal gyrus	1.2551	1.3221
							IV	0.9346	1.3106
							supramarginal gyrus	1.9834	1.2935
							anterior orbital gyrus	1.1662	1.2921
							III	1.126	1.2917
							ventral tegmental area	1.3511	1.2902
							medial orbital gyrus	1.224	1.2712
							frontal operculum	1.9593	1.262
							posterior orbital gyrus	1.0145	1.2543
							arcuate nucleus of the hypothalamus	1.0417	1.2525
							IX	0.6837	1.2466
							planum temporale	0.9987	1.2464
							V	1.1414	1.2399
							midbrain reticular formation	2.0613	1.2272
							X	1.0163	1.2253
							pretectal region	1.3233	1.2235
							corpus callosum	1.1879	1.217
							lateral hypothalamic area, mammillary region	1.2925	1.2048
							inferior olivary complex	1.9081	1.2004
							gyrus rectus	0.9868	1.1945
							arcuate nucleus of medulla	1.5947	1.1856
							IX	1.0134	1.1832
							inferior colliculus	1.1307	1.1809
							arcuate nucleus of medulla	1.2735	1.1728
							transverse gyri	1.1761	1.1612
							caudal group of intralaminar nuclei	1.4089	1.1579
							VIIIA	1.0007	1.1495
							VIIAf	0.745	1.1175
							lateral tuberal nucleus	1.1162	1.0657
							V	0.691	1.033
							X	0.7942	1.005
							central gray of the pons	1.4928	0.9582
							IV	0.7664	0.9144
							I-II	0.8558	0.879
							VIIAt	0.7684	0.8688
							VI	0.7704	0.8616
							III	0.7388	0.8161

## Sheet: Figure 3
structure	expression(log2)	Z-score
choroid plexus of the lateral ventricle	5.26249	7.66998
central glial substance	4.72722	6.409
paraventricular nuclei, right of thalamus	3.46537	3.43634
paraventricular nuclei, left of thalamus	3.19775	2.8059
cingulum bundle	2.81197	1.89708
substantia innominata	2.68063	1.58769
trochlear nucleus	2.61656	1.43674
locus ceruleus	2.6076	1.41564
hypoglossal nucleus	2.59725	1.39125
lateral hypothalamic area, anterior region	2.5906	1.37559
lateral habenular nucleus	2.57646	1.34227
basal nucleus of meynert	2.53444	1.24329
nucleus accumbens	2.5327	1.23918
anterior hypothalamic area	2.53245	1.2386
fastigial nucleus	2.5149	1.19725
X, paravermis	2.51312	1.19307
oculomotor nuclear complex	2.50961	1.18478
zona incerta	2.50564	1.17545
nucleus of the diagonal band, vertical division	2.47175	1.09559
central nucleus	2.46912	1.0894
paraventricular nucleus of the hypothalamus	2.46376	1.07678
amygdalohippocampal transition zone	2.46375	1.07676
occipital pole, lateral aspect	2.45766	1.0624
globose nucleus	2.42146	0.977122
bed nucleus of stria terminalis	2.38741	0.896905
motor nucleus of trigeminal nerve	2.38199	0.884155
CA4 field	2.36823	0.85173
midbrain reticular formation	2.34853	0.805314
midbrain raphe nuclei	2.34485	0.79664
body of caudate nucleus	2.34432	0.7954
facial motor nucleus	2.33932	0.783628
nucleus of the diagonal band, horizontal division	2.33109	0.764226
lateral hypothalamic area, tuberal region	2.32918	0.759726
medial parabrachial nucleus	2.32352	0.746392
claustrum	2.31574	0.728074
cuneiform nucleus	2.31179	0.718763
dorsal motor nucleus of the vagus	2.30994	0.714411
central gray substance of midbrain	2.30656	0.706446
posterior hypothalamic area	2.30593	0.704973
tail of caudate nucleus	2.29614	0.681895
tuberomammillary nucleus	2.28454	0.654584
raphe nuclei of medulla	2.27348	0.628512
substantia nigra, pars reticulata	2.25746	0.590774
olfactory tubercle	2.25443	0.583631
red nucleus	2.25045	0.574268
vestibular nuclei	2.24539	0.562347
subthalamic nucleus	2.24429	0.559761
medial habenular nucleus	2.23803	0.545005
dorsomedial hypothalamic nucleus	2.23204	0.530894
frontal pole, superior aspect	2.21676	0.494904
basolateral nucleus	2.20638	0.47045
Edinger-Westphal nucleus	2.20413	0.465141
CA3 field	2.20277	0.461936
supramammillary nucleus	2.18881	0.429049
lateral nucleus	2.18749	0.425944
ventral tegmental area	2.18695	0.424677
septal nuclei	2.18497	0.420008
perifornical nucleus	2.18112	0.410947
preoptic region	2.17886	0.405604
pontine reticular formation	2.1783	0.404294
cortico-medial group	2.17814	0.403928
piriform cortex	2.17058	0.386116
emboliform nucleus	2.17049	0.385888
cuneate nucleus	2.15136	0.340837
ventromedial hypothalamic nucleus	2.14515	0.326207
principal sensory nucleus of trigeminal nerve	2.1407	0.315719
substantia nigra, pars compacta	2.13357	0.298912
gracile nucleus	2.13338	0.298467
posterior group of nuclei	2.131	0.292866
globus pallidus, internal segment	2.12717	0.283841
spinal trigeminal nucleus	2.12357	0.275361
reticular nucleus of thalamus	2.12284	0.273635
subiculum	2.12278	0.273504
lateral mammillary nucleus	2.12209	0.271881
lateral medullary reticular group	2.11941	0.265562
subcuneiform nucleus	2.1183	0.262954
dorsal lateral geniculate nucleus	2.11773	0.261616
central medullary reticular group	2.10732	0.237092
pontine nuclei	2.1007	0.22148
basomedial nucleus	2.09632	0.211162
supraoptic nucleus	2.08666	0.188405
lateral hypothalamic area, mammillary region	2.08541	0.185478
paracentral lobule, posterior part, bank of cingulate sulcus	2.0755	0.16211
globus pallidus, external segment	2.07334	0.157039
interstitial nucleus of Cajal	2.07327	0.156868
abducens nucleus	2.07217	0.154287
dentate gyrus	2.07202	0.153933
gigantocellular group	2.07163	0.153003
medial geniculate complex	2.06265	0.131849
medial group of nuclei	2.05337	0.109984
CA2 field	2.05165	0.105937
precentral gyrus, bank of the central sulcus	2.05046	0.103125
rostral group of intralaminar nuclei	2.04802	0.0973939
temporal pole, superior aspect	2.04589	0.0923751
lateral group of nuclei, ventral division	2.04135	0.0816613
pontine raphe nucleus	2.03274	0.0613962
cingulate gyrus, parietal part, inferior bank of gyrus	2.0309	0.0570544
nucleus subceruleus	2.00868	0.00470899
CA1 field	2.00208	-0.0108373
putamen	1.99835	-0.0196177
postcentral gyrus, bank of the posterior central sulcus	1.98675	-0.0469585
anterior group of nuclei	1.98299	-0.0558099
dentate nucleus	1.97985	-0.0632154
lateral parabrachial nucleus	1.97871	-0.065883
lateral group of nuclei, dorsal division	1.97695	-0.0700449
fusiform gyrus, bank of cos	1.97444	-0.0759546
head of caudate nucleus	1.97265	-0.0801641
planum polare	1.97153	-0.0828063
nucleus of Darkschewitsch	1.9694	-0.0878292
fusiform gyrus, bank of the its	1.96585	-0.0961811
parahippocampal gyrus, lateral bank of gyrus	1.96173	-0.10589
parolfactory gyri	1.96151	-0.106404
paracentral lobule, anterior part, superior bank of gyrus	1.95745	-0.11598
superior olivary complex	1.95412	-0.123828
III	1.95177	-0.129361
superior colliculus	1.95023	-0.132975
inferior olivary complex	1.94571	-0.143645
cingulate gyrus, frontal part, superior bank of gyrus	1.94062	-0.155634
arcuate nucleus of medulla	1.92494	-0.192557
temporal pole, medial aspect	1.9226	-0.198074
parahippocampal gyrus, bank of the cos	1.91356	-0.21938
occipito-temporal gyrus, inferior bank of gyrus	1.91293	-0.220855
frontal pole, inferior aspect	1.91134	-0.224613
caudal group of intralaminar nuclei	1.90973	-0.228399
supramarginal gyrus, superior bank of gyrus	1.90904	-0.230012
inferior colliculus	1.90374	-0.242513
paracentral lobule, posterior part, lateral bank of gyrus	1.90014	-0.250998
mammillary body	1.90013	-0.251017
pineal gland	1.88205	-0.293595
angular gyrus, inferior bank of gyrus	1.87772	-0.303798
posterior orbital gyrus	1.87412	-0.312286
VIIIB	1.87039	-0.321068
superior frontal gyrus, medial bank of gyrus	1.86613	-0.331106
fusiform gyrus, lateral bank of gyrus	1.86552	-0.332553
cingulate gyrus, parietal part, superior bank of gyrus	1.86008	-0.34536
VIIB	1.85825	-0.349679
postcentral gyrus, superior lateral aspect of gyrus	1.85341	-0.361084
inferior temporal gyrus, lateral bank of gyrus	1.85318	-0.361605
angular gyrus, superior bank of gyrus	1.85115	-0.366397
corpus callosum	1.84778	-0.374338
short insular gyri	1.84357	-0.384264
long insular gyri	1.83689	-0.399996
lateral tuberal nucleus	1.83673	-0.400364
superior temporal gyrus, lateral bank of gyrus	1.82508	-0.427805
superior frontal gyrus, lateral bank of gyrus	1.82203	-0.434992
VI, paravermis	1.82176	-0.435637
middle temporal gyrus, superior bank of gyrus	1.82158	-0.436064
central gray of the pons	1.81953	-0.440885
inferior frontal gyrus, orbital part	1.81625	-0.448616
cingulate gyrus, frontal part, inferior bank of gyrus	1.81553	-0.450308
superior rostral gyrus	1.81351	-0.455071
inferior frontal gyrus, opercular part	1.81286	-0.456592
medial orbital gyrus	1.81138	-0.460094
superior parietal lobule, inferior bank of gyrus	1.81044	-0.462312
lingual gyrus, peristriate	1.80969	-0.464064
medial mammillary nucleus	1.80758	-0.469045
inferior temporal gyrus, bank of the its	1.8068	-0.470885
inferior occipital gyrus, inferior bank of gyrus	1.80626	-0.472152
pretectal region	1.8045	-0.476306
precentral gyrus, superior lateral aspect of gyrus	1.80355	-0.478537
superior temporal gyrus, inferior bank of gyrus	1.80344	-0.478781
cingulate gyrus, retrosplenial part, inferior bank of gyrus	1.80257	-0.48085
precentral gyrus, inferior lateral aspect of gyrus	1.79868	-0.490008
lateral orbital gyrus	1.79656	-0.495006
cochlear nuclei	1.79393	-0.50119
Crus I, lateral hemisphere	1.79388	-0.50132
subcallosal cingulate gyrus	1.78313	-0.526635
V, paravermis	1.78009	-0.533788
postcentral gyrus, inferior lateral aspect of gyrus	1.77619	-0.542991
precuneus, inferior lateral bank of gyrus	1.77403	-0.548073
postcentral gyrus, bank of the central sulcus	1.77397	-0.548226
VIIB, paravermis	1.77021	-0.557069
VIIIA	1.77019	-0.557133
temporal pole, inferior aspect	1.76596	-0.567082
superior parietal lobule, superior bank of gyrus	1.76378	-0.572233
middle temporal gyrus, inferior bank of gyrus	1.7636	-0.57265
precentral gyrus, bank of the precentral sulcus	1.75413	-0.594952
gyrus rectus	1.75137	-0.601459
superior occipital gyrus, superior bank of gyrus	1.74869	-0.60778
VIIAt	1.74838	-0.608501
precuneus, superior lateral bank of gyrus	1.74723	-0.611206
pallidohypothalamic nucleus	1.73979	-0.628743
inferior frontal gyrus, triangular part	1.73818	-0.632536
VIIB, lateral hemisphere	1.73799	-0.632977
middle frontal gyrus, inferior bank of gyrus	1.73261	-0.645642
inferior rostral gyrus	1.73116	-0.649057
inferior temporal gyrus, bank of mts	1.72973	-0.65244
cuneus, peristriate	1.72929	-0.653474
middle frontal gyrus, superior bank of gyrus	1.71525	-0.686538
III, paravermis	1.71466	-0.687943
VIIIA, paravermis	1.70509	-0.710481
anterior orbital gyrus	1.69507	-0.734084
arcuate nucleus of the hypothalamus	1.69504	-0.734154
IX, paravermis	1.69246	-0.740242
paracentral lobule, anterior part, inferior bank of gyrus	1.69124	-0.743101
Crus II, paravermis	1.69121	-0.743171
inferior occipital gyrus, superior bank of gyrus	1.68627	-0.754821
lingual gyrus, striate	1.68486	-0.758137
VIIIA, lateral hemisphere	1.68339	-0.761602
IV	1.67657	-0.777677
cingulate gyrus, retrosplenial part, superior bank of gyrus	1.66891	-0.795724
VI, lateral hemisphere	1.66851	-0.796664
transverse gyri	1.66846	-0.796785
frontal operculum	1.66091	-0.814557
supramarginal gyrus, inferior bank of gyrus	1.65282	-0.83361
cuneus, striate	1.65258	-0.834194
paraterminal gyrus	1.6516	-0.836497
superior occipital gyrus, inferior bank of gyrus	1.64788	-0.845259
planum temporale	1.64749	-0.846181
IX	1.64609	-0.849468
occipito-temporal gyrus, superior bank of gyrus	1.64322	-0.856246
VIIIB, paravermis	1.63111	-0.884766
IX, lateral hemisphere	1.62768	-0.892855
Crus II, lateral hemisphere	1.62726	-0.893845
X	1.61608	-0.920166
VI	1.61485	-0.923074
frontal pole, medial aspect	1.60599	-0.943945
Crus I, paravermis	1.5875	-0.9875
paracentral lobule, anterior part	1.58426	-0.995132
I-II	1.58263	-0.998966
Heschl's gyrus	1.58079	-1.00332
VIIAf	1.57816	-1.00951
IV, paravermis	1.57159	-1.02499
V, lateral hemisphere	1.52404	-1.137
V	1.51613	-1.15564
occipital pole, inferior aspect	1.47518	-1.25211
VIIIB, lateral hemisphere	1.37334	-1.492
occipital pole, superior aspect	1.35162	-1.54319
superior frontal gyrus	1.33059	-1.59273
IV, lateral hemisphere	1.29077	-1.68652
III, lateral hemisphere	1.28717	-1.69502
X, lateral hemisphere	1.12516	-2.07667

## Sheet: Figure 4
Figure 4A			Figure 4B			Figure 4C		Human middle temporal gyrus	Human posterior cingulate cortex
cell type	% of total positive cells		cell type	% of total positive cells			cell type	positive cells%	positive cells%
Endothelial cells	0		Endothelial cells	2			All cells	2	1.38
Excitatory neurons	225		Excitatory neurons	88			Endothelial cells	0.05	1.12
Inhibitory neurons	70		Inhibitory neurons	13			Neurons	2.01	1.88
OPC	5		OPC	5			Excitatory neurons	2.14	2.18
ODC	8		ODC	9			Inhibitory neurons	1.68	0.98
Astrocytes	3		Astrocytes	14			OPC	2.1	1.54
Microglia	1		Microglia	2			ODC	2.56	0.42
							Astrocytes	1.03	1.1
							Microglia	1.59	0.56

## Sheet: Figure 6A
Figure 6A
cell type	% of total positive cells		cell type	% of total positive cells		cell type	% of total positive cells		cell type	% of total positive cells
Endothelial cells	31		Endothelial cells	29		Endothelial cells	81		Endothelial cells	33
Excitatory neurons	26		Excitatory neurons	6		Inhibitory neurons	4		Inhibitory neurons	3
Inhibitory neurons	15		ODC	1		OPC			Golgi cells	2
ODC	1		Astrocytes	1		ODC	3		Purkinje cells	1
OPC	3		Other cells	1		Microglia	1		Choroid cell	2
Astrocytes	1					Dopamine neurons	3		Endothelial stalk cells	6
Microglia	1					Other neurons	3		OPC	2
Pericyte	6								ODC	3
Other cells	0

## Sheet: Figure 6B
cluster_id	log1Exp	Z value
PER3	0.245706	10.6765
PER1	0.166142	7.17287
VECA	0.160682	6.93246
PER2	0.151806	6.54158
PSPEP8	0.0350913	1.40201
VSMCA	0.022673	0.855167
SCGLU5	0.00790518	0.20486
PSNP6	0.00754721	0.189096
CHOR	0.00652886	0.144253
VECV	0.00609649	0.125214
SYNOR4	0.00547947	0.0980428
TEGLU9	0.00493828	0.0742116
VECC	0.00486619	0.071037
EPSC	0.00481929	0.0689716
MEINH3	0.00386848	0.0271023
PSNP1	0.00353983	0.0126301
VLMC1	0.00284495	-0.0179689
MEINH9	0.00249688	-0.0332964
DEGLU5	0.00234467	-0.0399991
TEGLU6	0.00167084	-0.0696712
TEINH17	0.00148039	-0.0780581
RGSZ	0.00132188	-0.085038
EPEN	0.00129116	-0.0863909
TEGLU7	0.00123127	-0.0890278
ACMB	0.00116077	-0.0921326
MOL2	0.000998	-0.0992823
DEGLU3	0.000898	-0.103701
MGL1	0.000881	-0.104467
MFOL1	0.000814	-0.107403
TEGLU11	0.000683	-0.113179
COP1	0.000653	-0.114513
TEGLU8	0.000651	-0.114578
MSN4	0.000631	-0.115456
ACNT1	0.000602	-0.116736
ACTE2	0.000503	-0.121086
TEGLU24	0.000491	-0.121635
TEGLU3	0.000366	-0.127144
MOL1	0.000344	-0.128091
ENT9	0	-0.143247
ENT8	0	-0.143247
ENT6	0	-0.143247
ENT5	0	-0.143247
ENT4	0	-0.143247
ENT7	0	-0.143247
ENT3	0	-0.143247
ENT2	0	-0.143247
ENT1	0	-0.143247
ENTG1	0	-0.143247
ENTG4	0	-0.143247
ENTG2	0	-0.143247
ENTG3	0	-0.143247
ENTG6	0	-0.143247
ENTG5	0	-0.143247
ENTG7	0	-0.143247
ENMFB	0	-0.143247
MOL3	0	-0.143247
MFOL2	0	-0.143247
NFOL1	0	-0.143247
NFOL2	0	-0.143247
COP2	0	-0.143247
HBSER2	0	-0.143247
HBSER1	0	-0.143247
HBSER3	0	-0.143247
HBSER4	0	-0.143247
HBSER5	0	-0.143247
TEGLU15	0	-0.143247
TEGLU16	0	-0.143247
TEGLU5	0	-0.143247
TEGLU4	0	-0.143247
TEGLU22	0	-0.143247
TEGLU23	0	-0.143247
TEGLU17	0	-0.143247
TEGLU18	0	-0.143247
TEGLU19	0	-0.143247
TEGLU2	0	-0.143247
TEGLU14	0	-0.143247
TEGLU13	0	-0.143247
TEGLU21	0	-0.143247
TEGLU10	0	-0.143247
TEGLU20	0	-0.143247
TEGLU12	0	-0.143247
TEINH10	0	-0.143247
TEINH11	0	-0.143247
TEINH12	0	-0.143247
TEINH9	0	-0.143247
OBINH5	0	-0.143247
TEINH5	0	-0.143247
TEINH6	0	-0.143247
TEINH7	0	-0.143247
TEINH8	0	-0.143247
TEINH4	0	-0.143247
TEINH20	0	-0.143247
TEINH13	0	-0.143247
TEINH14	0	-0.143247
TEINH16	0	-0.143247
TEINH15	0	-0.143247
TEINH19	0	-0.143247
TEINH21	0	-0.143247
HYPEP7	0	-0.143247
HYPEP6	0	-0.143247
DEINH8	0	-0.143247
MBDOP1	0	-0.143247
MBDOP2	0	-0.143247
MEGLU14	0	-0.143247
MEGLU11	0	-0.143247
MEGLU10	0	-0.143247
MEGLU9	0	-0.143247
MEGLU8	0	-0.143247
MEGLU7	0	-0.143247
MEGLU6	0	-0.143247
MEGLU2	0	-0.143247
MEGLU3	0	-0.143247
MEGLU1	0	-0.143247
MEGLU5	0	-0.143247
MEGLU4	0	-0.143247
DEGLU4	0	-0.143247
OBNBL1	0	-0.143247
MBCHO1	0	-0.143247
HBGLU9	0	-0.143247
SCGLU1	0	-0.143247
HBGLU10	0	-0.143247
SCGLU10	0	-0.143247
HBGLU2	0	-0.143247
HBGLU3	0	-0.143247
HBNOR	0	-0.143247
HBGLU1	0	-0.143247
DEGLU2	0	-0.143247
DEGLU1	0	-0.143247
MSN1	0	-0.143247
MSN2	0	-0.143247
MSN3	0	-0.143247
MSN5	0	-0.143247
MSN6	0	-0.143247
OEC	0	-0.143247
DETPH	0	-0.143247
RGDG	0	-0.143247
OPC	0	-0.143247
SZNBL	0	-0.143247
EPMB	0	-0.143247
HYPEN	0	-0.143247
OBDOP2	0	-0.143247
OBINH2	0	-0.143247
OBINH3	0	-0.143247
OBINH1	0	-0.143247
OBINH4	0	-0.143247
OBNBL2	0	-0.143247
TEGLU1	0	-0.143247
DGGRC2	0	-0.143247
DGGRC1	0	-0.143247
DGNBL1	0	-0.143247
DGNBL2	0	-0.143247
OBNBL3	0	-0.143247
HYPEP3	0	-0.143247
HYPEP2	0	-0.143247
HYPEP1	0	-0.143247
CBNBL2	0	-0.143247
CBGRC	0	-0.143247
CR	0	-0.143247
CBNBL1	0	-0.143247
SEPNBL	0	-0.143247
OBNBL5	0	-0.143247
OBNBL4	0	-0.143247
DECHO2	0	-0.143247
HYPEP5	0	-0.143247
DEINH7	0	-0.143247
HYPEP4	0	-0.143247
HBGLU8	0	-0.143247
HBGLU6	0	-0.143247
HBGLU7	0	-0.143247
HBGLU5	0	-0.143247
HBGLU4	0	-0.143247
HBCHO2	0	-0.143247
HBCHO1	0	-0.143247
HBCHO3	0	-0.143247
HBADR	0	-0.143247
HBCHO4	0	-0.143247
TECHO	0	-0.143247
DECHO1	0	-0.143247
SCINH1	0	-0.143247
HBINH8	0	-0.143247
HBINH7	0	-0.143247
HBINH5	0	-0.143247
CBINH2	0	-0.143247
CBPC	0	-0.143247
CBINH1	0	-0.143247
MEINH1	0	-0.143247
TEINH18	0	-0.143247
DEINH2	0	-0.143247
DEINH1	0	-0.143247
DEINH6	0	-0.143247
MEINH13	0	-0.143247
MEINH8	0	-0.143247
MEINH14	0	-0.143247
DEINH4	0	-0.143247
DEINH5	0	-0.143247
TEINH2	0	-0.143247
TEINH1	0	-0.143247
HBINH4	0	-0.143247
HBINH3	0	-0.143247
HBINH1	0	-0.143247
SCINH11	0	-0.143247
MEINH4	0	-0.143247
DEINH3	0	-0.143247
MEINH2	0	-0.143247
MEINH7	0	-0.143247
MEINH5	0	-0.143247
MEINH12	0	-0.143247
MEINH11	0	-0.143247
MEINH10	0	-0.143247
MEINH6	0	-0.143247
HBINH6	0	-0.143247
HBINH2	0	-0.143247
SCGLU8	0	-0.143247
SCGLU9	0	-0.143247
SCGLU7	0	-0.143247
SCGLU2	0	-0.143247
SCGLU3	0	-0.143247
SCGLU4	0	-0.143247
SCGLU6	0	-0.143247
SCINH5	0	-0.143247
SCINH6	0	-0.143247
SCINH7	0	-0.143247
HBINH9	0	-0.143247
SCINH2	0	-0.143247
SCINH4	0	-0.143247
SCINH3	0	-0.143247
SCINH10	0	-0.143247
SCINH9	0	-0.143247
SCINH8	0	-0.143247
TEINH3	0	-0.143247
OBDOP1	0	-0.143247
HYPEP8	0	-0.143247
ABC	0	-0.143247
VLMC2	0	-0.143247
MGL2	0	-0.143247
MGL3	0	-0.143247
PVM2	0	-0.143247
PVM1	0	-0.143247
SCHW	0	-0.143247
SATG2	0	-0.143247
SATG1	0	-0.143247
ACBG	0	-0.143247
ACOB	0	-0.143247
ACTE1	0	-0.143247
ACNT2	0	-0.143247
SYNOR3	0	-0.143247
SYNOR2	0	-0.143247
SYNOR1	0	-0.143247
SYNOR5	0	-0.143247
SYCHO2	0	-0.143247
SYCHO1	0	-0.143247
PSPEP1	0	-0.143247
PSPEP3	0	-0.143247
PSPEP2	0	-0.143247
PSPEP4	0	-0.143247
PSPEP5	0	-0.143247
PSPEP6	0	-0.143247
PSPEP7	0	-0.143247
PSNF2	0	-0.143247
PSNF3	0	-0.143247
PSNF1	0	-0.143247
PSNP3	0	-0.143247
PSNP2	0	-0.143247
PSNP5	0	-0.143247
PSNP4	0	-0.143247
